# Supplementary material
Source: PubMed Central journal article supplement (PMC4997859)
Supplement: AAC.00607-16_zac009165486so1.pdf [file AAC.00607-16_zac009165486so1.pdf]

**TABLE S1** Frequency of subjects experiencing TEAEs<sup>a</sup> and number of events summarized per treatment (Trial 1)

| MedDRA <sup>b</sup> system organ class <sup>c</sup> | MedDRA preferred term <sup>c</sup> | Statistic | MHAA4549A |          |          |          | Overall    | Placebo  |
|-----------------------------------------------------|------------------------------------|-----------|-----------|----------|----------|----------|------------|----------|
|                                                     |                                    |           | 1.5 mg/kg | 5 mg/kg  | 15 mg/kg | 45 mg/kg |            |          |
| Number of subjects dosed                            |                                    | N         | 4         | 4        | 4        | 4        | 16         | 5        |
| Number of TEAEs                                     |                                    | E         | 4         | 7        | 4        | 4        | 19         | 4        |
| Number of subjects <sup>d</sup> with TEAEs          |                                    | n (%)     | 2 (50)    | 3 (75)   | 2 (50)   | 3 (75)   | 10 (62.5)  | 3 (60)   |
| Nervous system disorders                            |                                    | n (%) E   | 0         | 2 (50) 2 | 1 (25) 1 | 2 (50) 2 | 5 (31.3) 5 | 1 (20) 1 |
| Headache                                            |                                    | n (%) E   | 0         | 2 (50) 2 | 1 (25) 1 | 1 (25) 1 | 4 (25) 4   | 1 (20) 1 |
| Dysgeusia                                           |                                    | n (%) E   | 0         | 0        | 0        | 1 (25) 1 | 1 (6.3) 1  | 0        |
| Gastrointestinal disorders                          |                                    | n (%) E   | 0         | 2 (50) 2 | 1 (25) 3 | 1 (25) 1 | 4 (25) 6   | 0        |
| Abdominal pain                                      |                                    | n (%) E   | 0         | 0        | 0        | 1 (25) 1 | 1 (6.3) 1  | 0        |
| Abdominal pain upper                                |                                    | n (%) E   | 0         | 1 (25) 1 | 0        | 0        | 1 (6.3) 1  | 0        |
| Eructation                                          |                                    | n (%) E   | 0         | 0        | 1 (25) 1 | 0        | 1 (6.3) 1  | 0        |
| Flatulence                                          |                                    | n (%) E   | 0         | 0        | 1 (25) 1 | 0        | 1 (6.3) 1  | 0        |
| Nausea                                              |                                    | n (%) E   | 0         | 0        | 1 (25) 1 | 0        | 1 (6.3) 1  | 0        |
| Toothache                                           |                                    | n (%) E   | 0         | 1 (25) 1 | 0        | 0        | 1 (6.3) 1  | 0        |
| Respiratory, thoracic and mediastinal disorders     |                                    | n (%) E   | 1 (25) 2  | 1 (25) 2 | 0        | 1 (25) 1 | 3 (18.8) 5 | 0        |
| Oropharyngeal pain                                  |                                    | n (%) E   | 1 (25) 1  | 0        | 0        | 2 (25) 1 | 2 (12.5) 2 | 0        |
| Cough                                               |                                    | n (%) E   | 0         | 1 (25) 1 | 0        | 0        | 1 (6.3) 1  | 0        |
| Nasal congestion                                    |                                    | n (%) E   | 1 (25) 1  | 0        | 0        | 0        | 1 (6.3) 1  | 0        |
| Rhinorrhoea                                         |                                    | n (%) E   | 0         | 1 (25) 1 | 0        | 0        | 1 (6.3) 1  | 0        |
| Injury, poisoning and procedural complications      |                                    | n (%) E   | 2 (50) 2  | 0        | 0        | 0        | 2 (12.5) 2 | 1 (20) 1 |
| Ligament sprain                                     |                                    | n (%) E   | 1 (25) 1  | 0        | 0        | 0        | 1 (6.3) 1  | 0        |
| Tooth fracture                                      |                                    | n (%) E   | 1 (25) 1  | 0        | 0        | 0        | 1 (6.3) 1  | 0        |
| Burns second degree                                 |                                    | n (%) E   | 0         | 0        | 0        | 0        | 0          | 1 (20) 1 |
| Investigations                                      |                                    | n (%) E   | 0         | 1 (25) 1 | 0        | 0        | 1 (6.3) 1  | 1 (20) 1 |
| Alanine aminotransferase increased                  |                                    | n (%) E   | 0         | 1 (25) 1 | 0        | 0        | 1 (6.3) 1  | 0        |
| Blood creatine phosphokinase increased              |                                    | n (%) E   | 0         | 0        | 0        | 0        | 0          | 1 (20) 1 |
| Skin and subcutaneous tissue disorders              |                                    | n (%) E   | 0         | 0        | 0        | 0        | 0          | 1 (20) 1 |
| Urticaria                                           |                                    | n (%) E   | 0         | 0        | 0        | 0        | 0          | 1 (20) 1 |

<sup>a</sup>TEAE, treatment-emergent adverse event<sup>b</sup>MedDRA, Medical Dictionary for Regulatory Activities; MedDRA Version 16.0<sup>c</sup>System organ class and preferred term are presented in descending order of overall incidence rate considering all active subjects.<sup>d</sup>Each subject could only contribute once to each of the incidence rates, regardless of the number of occurrences.

**TABLE S2** Frequency of subjects experiencing TEAEs<sup>a</sup> and number of events summarized per treatment (Trial 2)

| MedDRA <sup>b</sup> system organ class <sup>c</sup>  | MedDRA preferred term <sup>c</sup> | Statistic | MHAA4549A |          |            |            |
|------------------------------------------------------|------------------------------------|-----------|-----------|----------|------------|------------|
|                                                      |                                    |           | 8400 mg   | 10800 mg | Overall    | Placebo    |
| Number of subjects dosed                             |                                    | N         | 4         | 4        | 8          | 6          |
| Number of TEAEs                                      |                                    | E         | 15        | 9        | 24         | 10         |
| Number of subjects <sup>d</sup> with TEAEs           |                                    | n (%)     | 3 (75)    | 4 (100)  | 7 (87.5)   | 5 (83.3)   |
| Nervous system disorders                             |                                    | n (%) E   | 3 (75) 3  | 1 (25) 1 | 4 (50) 4   | 2 (33.3) 4 |
| Headache                                             |                                    | n (%) E   | 3 (75) 3  | 1 (25) 1 | 4 (50) 4   | 2 (33.3) 4 |
| Infections and infestations                          |                                    | n (%) E   | 1 (25) 3  | 2 (50) 2 | 3 (37.5) 5 | 2 (33.3) 3 |
| Nasopharyngitis                                      |                                    | n (%) E   | 1 (25) 1  | 2 (50) 2 | 3 (37.5) 3 | 2 (33.3) 3 |
| Bacterial infection                                  |                                    | n (%) E   | 1 (25) 2  | 0        | 1 (12.5) 2 | 0          |
| General disorders and administration site conditions |                                    | n (%) E   | 2 (50) 2  | 1 (25) 1 | 3 (37.5) 3 | 0          |
| Asthenia                                             |                                    | n (%) E   | 0         | 1 (25) 1 | 1 (12.5) 1 | 0          |
| Fatigue                                              |                                    | n (%) E   | 1 (25) 1  | 0        | 1 (12.5) 1 | 0          |
| Peripheral swelling                                  |                                    | n (%) E   | 1 (25) 1  | 0        | 1 (12.5) 1 | 0          |
| Gastrointestinal disorders                           |                                    | n (%) E   | 1 (25) 2  | 1 (25) 1 | 2 (25) 3   | 0          |
| Abdominal discomfort                                 |                                    | n (%) E   | 1 (25) 1  | 0        | 1 (12.5) 1 | 0          |
| Faeces soft                                          |                                    | n (%) E   | 1 (25) 1  | 0        | 1 (12.5) 1 | 0          |
| Nausea                                               |                                    | n (%) E   | 0         | 1 (25) 1 | 1 (12.5) 1 | 0          |
| Respiratory, thoracic and mediastinal disorders      |                                    | n (%) E   | 1 (25) 1  | 1 (25) 1 | 2 (25) 2   | 2 (33.3) 2 |
| Nasal congestion                                     |                                    | n (%) E   | 1 (25) 1  | 0        | 1 (12.5) 1 | 0          |
| Nasal discomfort                                     |                                    | n (%) E   | 0         | 1 (25) 1 | 1 (12.5) 1 | 0          |
| Oropharyngeal discomfort                             |                                    | n (%) E   | 0         | 0        | 0          | 1 (16.7) 1 |
| Rhinorrhoea                                          |                                    | n (%) E   | 0         | 0        | 0          | 1 (16.7) 1 |
| Investigations                                       |                                    | n (%) E   | 0         | 1 (25) 2 | 1 (12.5) 2 | 0          |
| Blood creatine phosphokinase increased               |                                    | n (%) E   | 0         | 1 (25) 2 | 1 (12.5) 2 | 0          |
| Reproductive system and breast disorders             |                                    | n (%) E   | 1 (25) 2  | 0        | 1 (12.5) 2 | 0          |
| Metrorrhagia                                         |                                    | n (%) E   | 1 (25) 2  | 0        | 1 (12.5) 2 | 0          |
| Eye disorders                                        |                                    | n (%) E   | 1 (25) 1  | 0        | 1 (12.5) 1 | 0          |
| Conjunctival hyperaemia                              |                                    | n (%) E   | 1 (25) 1  | 0        | 1 (12.5) 1 | 0          |
| Injury, poisoning and procedural complications       |                                    | n (%) E   | 0         | 1 (25) 1 | 1 (12.5) 1 | 0          |
| Contusion                                            |                                    | n (%) E   | 0         | 1 (25) 1 | 1 (12.5) 1 | 0          |
| Skin and subcutaneous tissue disorders               |                                    | n (%) E   | 1 (25) 1  | 0        | 1 (12.5) 1 | 0          |
| Pruritus                                             |                                    | n (%) E   | 1 (25) 1  | 0        | 1 (12.5) 1 | 0          |
| Musculoskeletal and connective tissue disorders      |                                    | n (%) E   | 0         | 0        | 0          | 1 (16.7) 1 |
| Arthralgia                                           |                                    | n (%) E   | 0         | 0        | 0          | 1 (16.7) 1 |

<sup>a</sup>TEAE, treatment-emergent adverse event.

<sup>b</sup>MedDRA, Medical Dictionary for Regulatory Activities; MedDRA Version 17.1.

<sup>c</sup>System organ class and preferred term are presented in descending order of overall incidence rate considering all active subjects.

<sup>d</sup>Each subject could only contribute once to each of the incidence rates, regardless of the number of occurrences.
